# Supplementary material
Source: publisher figshare collection journal article supplement (https://sage.figshare.com/ndownloader/files/18057671)
Supplement: Supplementary file 1 [file 18057671]

## Annexure B

Comparison of question effectiveness (as no. of truth scores/when lies told, percentage)

|     |                                                                                                   | AFP recruits | University students (previous research) |
|-----|---------------------------------------------------------------------------------------------------|--------------|-----------------------------------------|
| Q1  | Smoking should be banned in all public places                                                     | 31.9%        | <b>60.5%</b>                            |
| Q2  | Marriage should be available to all, not just heterosexual people                                 | <i>20.3%</i> | <i>38.8%</i>                            |
| Q3  | Death Penalty should be used in Australia for extreme cases                                       | 42.7%        | 45.9%                                   |
| Q4  | Abortion should be legal and accessible                                                           | <i>20.2%</i> | 49.1%                                   |
| Q5  | People should be allowed to choose when they die                                                  | <i>21.0%</i> | 46.5%                                   |
| Q6  | The burqa is a security risk                                                                      | <b>51.6%</b> | 50.9%                                   |
| Q7  | Religion should be taught in schools                                                              | 33.5%        | <b>58.7%</b>                            |
| Q8  | Circumcision is child abuse                                                                       | <b>62.1%</b> | 48.2%                                   |
| Q9  | Women who choose C-sections are too posh to push                                                  | 36.0%        | <i>37.1%</i>                            |
| Q10 | Social media limits social interaction                                                            | 46.7%        | <b>65.5%</b>                            |
| Q11 | Celebrities lose their right to privacy when they become public figures                           | <b>50.7%</b> | 45.4%                                   |
| Q12 | People in the USA have the right to bear arms, it shouldn't be taken away for the few who misuse. | 37.7%        | 38.7%                                   |

*Most effective are bold; least effective are italicised*
